# Supplementary material
Source: publisher site journal article supplement (https://www.dovepress.com/get_supplementary_file.php?f=318724.docx)
Supplement: Supplementary file 1 [file get_supplementary_file.php]

DNA and RNA sequencing recapitulated aberrant tumor metabolism in liver cancer cell lines

Yihong Sun, Xia Tang, Bo Ye, and Keyue Ding*

Department of Bioinformatics, School of Basic Medicine, Chongqing Medical University, Chongqing, 410006, P. R. China

*. Corresponding authors

Keyue Ding, PhD,

E-mail: [ding.keyue@igenetics.org.cn](mailto:ding.keyue@igenetics.org.cn)

**Supplementary figures**

Fig S1. Expression pattern of genes related to liver differentiation, epithelial-mesenchymal transition (EMT)-metastasis, and proliferation that were differentially expressed among the three subgroups.

Fig S2. Mutational landscape of metabolic-associated genes with mutations occurred at least in two hLCCLs
